# Supplementary material for: Improving the yield of graphene oxide-catalysed N-heterocyclization of amines through fed batch mode
Source: Royal Society of Chemistry journal article supplement (doi:10.1039/d2nj03830g), 2022-01-01
Supplement: d2nj03830g1.pdf [file d2nj03830g1.pdf]

## Supporting Information

### Manuscript Title:

### **Improving yield of graphene oxide catalysed n-heterocyclization of amines through fed batch mode**

Olviya S. Gonsalves<sup>1</sup>, Jyoti P. Ambre<sup>1</sup>, and Parag R. Nemade<sup>1, 2, \*</sup>

<sup>1</sup> Department of Chemical Engineering, Institute of Chemical Technology, Mumbai-400 019, India

<sup>2</sup> Institute of Chemical Technology, Marathwada Campus, Jalna-431 203, India

\* Corresponding Author: Parag R. Nemade; email: [pr.nemade@ictmumbai.edu.in](mailto:pr.nemade@ictmumbai.edu.in); Tel: +91 22 3361 2027.

JPM and OSG have contributed equally

## Relative abundance of oxygen functionalities in graphene oxide obtained through the deconvolution of XPS spectra

| Compound | Peak         | % Area |
|----------|--------------|--------|
| GO       | C1s (Survey) | 69.5   |
|          | C-C          | 48.15  |
|          | C-OH         | 34.56  |
|          | C=O          | 17.29  |
|          | O1s (Survey) | 27.80  |
|          | O/C ratio    | 0.43   |

## $^1\text{H}$ and $^{13}\text{C}$ NMR spectra of the derivatives synthesized

a) 1-phenylpyrrolidine (3a)

$^1\text{H}$  NMR (400 MHz,  $\text{cdCl}_3$ )  $\delta$  7.19 (dd,  $J = 32.0, 23.4$  Hz, 2H), 6.65 (t,  $J = 7.3$  Hz, 1H), 6.57 (d,  $J = 8.0$  Hz, 2H), 3.28 (t,  $J = 6.5$  Hz, 4H), 2.10 – 1.80 (m, 4H).

$^{13}\text{C}$  NMR (101 MHz,  $\text{cdCl}_3$ )  $\delta$  147.95, 129.08, 115.32, 111.61, 47.53, 25.43.

$^1\text{H}$  NMR Spectrum

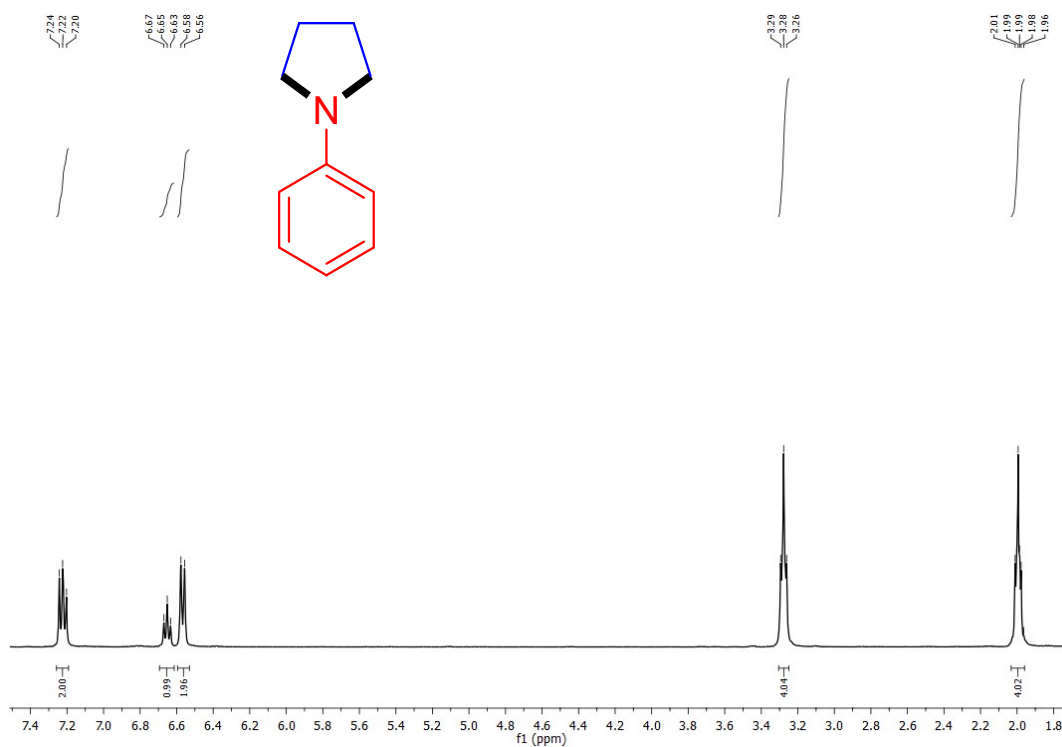

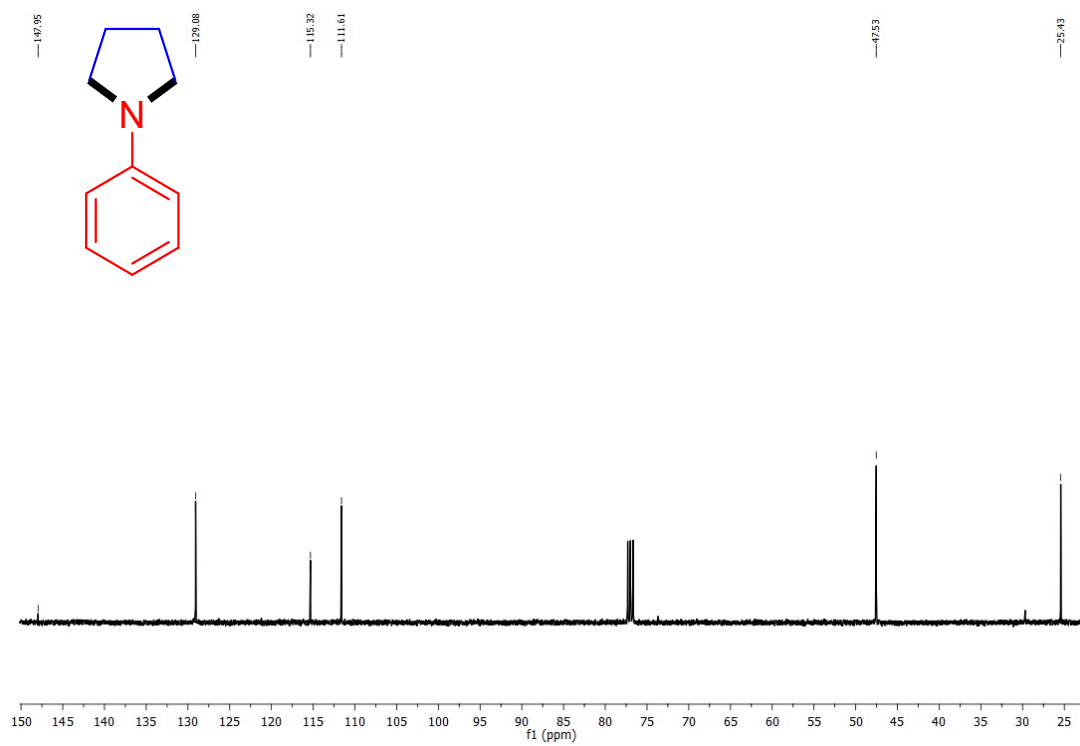

b) 1-(o-tolyl)pyrrolidine (3b)

$^1\text{H NMR}$  (400 MHz,  $\text{CDCl}_3$ )  $\delta$  7.04 (t,  $J = 6.8$  Hz, 2H), 6.81 (d,  $J = 8.4$  Hz, 1H), 6.76 (t,  $J = 7.3$  Hz, 1H), 3.11 (t,  $J = 5.8$  Hz, 4H), 2.25 (s, 3H), 1.86 (t,  $J = 5.9$  Hz, 4H).

$^{13}\text{C NMR}$  (101 MHz,  $\text{CDCl}_3$ )  $\delta$  148.04, 138.73, 128.94, 116.36, 112.36, 108.89, 47.57, 25.40, 21.79.

$^1\text{H NMR}$  Spectrum

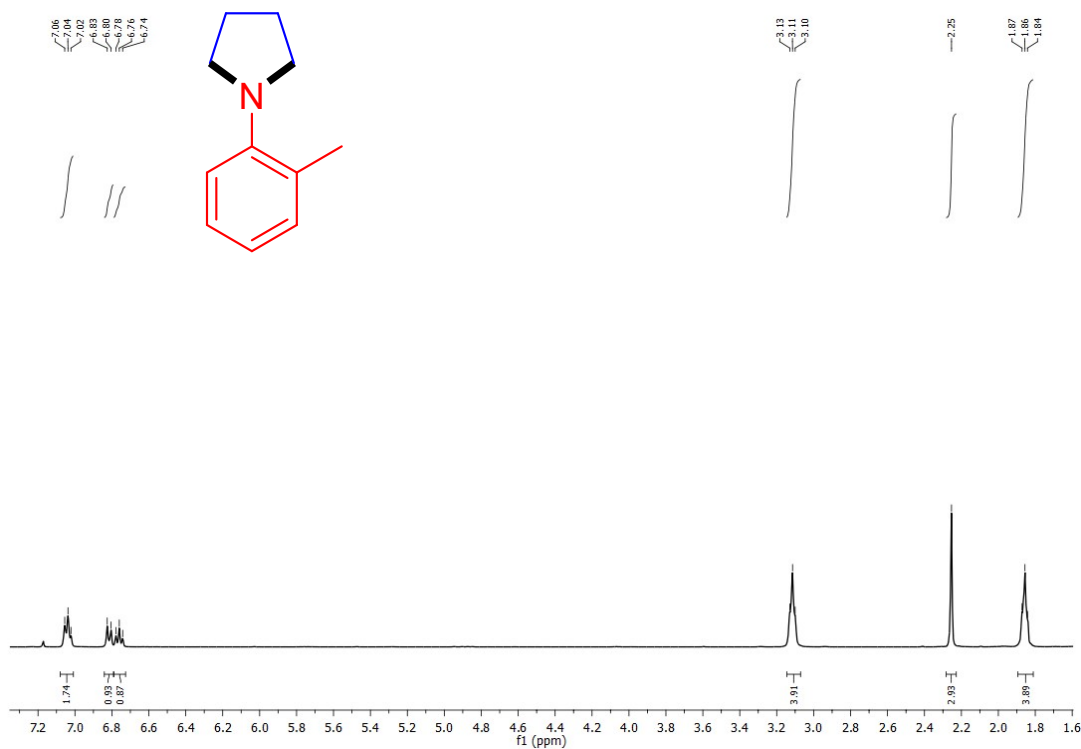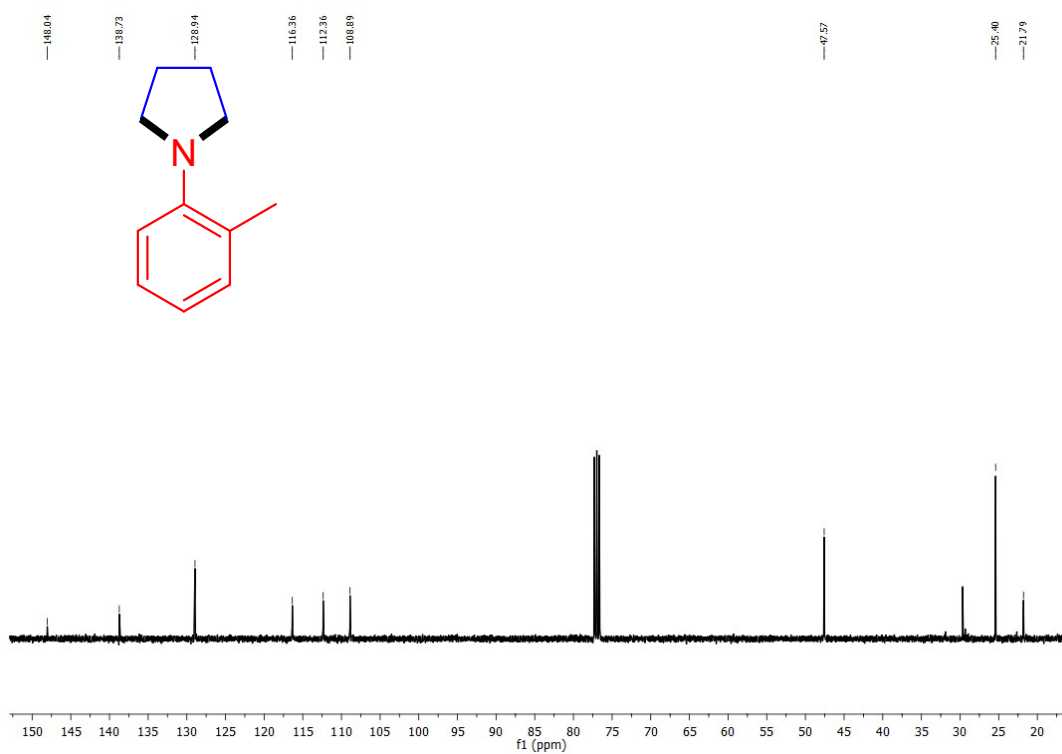

c) 1-(m-tolyl)pyrrolidine (3c)

$^1\text{H NMR}$  (400 MHz,  $\text{CDCl}_3$ )  $\delta$  7.03 (t,  $J = 8.1$  Hz, 1H), 6.41 (d,  $J = 7.2$  Hz, 1H), 6.32 (d, 2H), 3.21 – 3.17 (m, 4H), 2.23 (s, 3H), 1.90 (t,  $J = 6.4$  Hz, 4H).

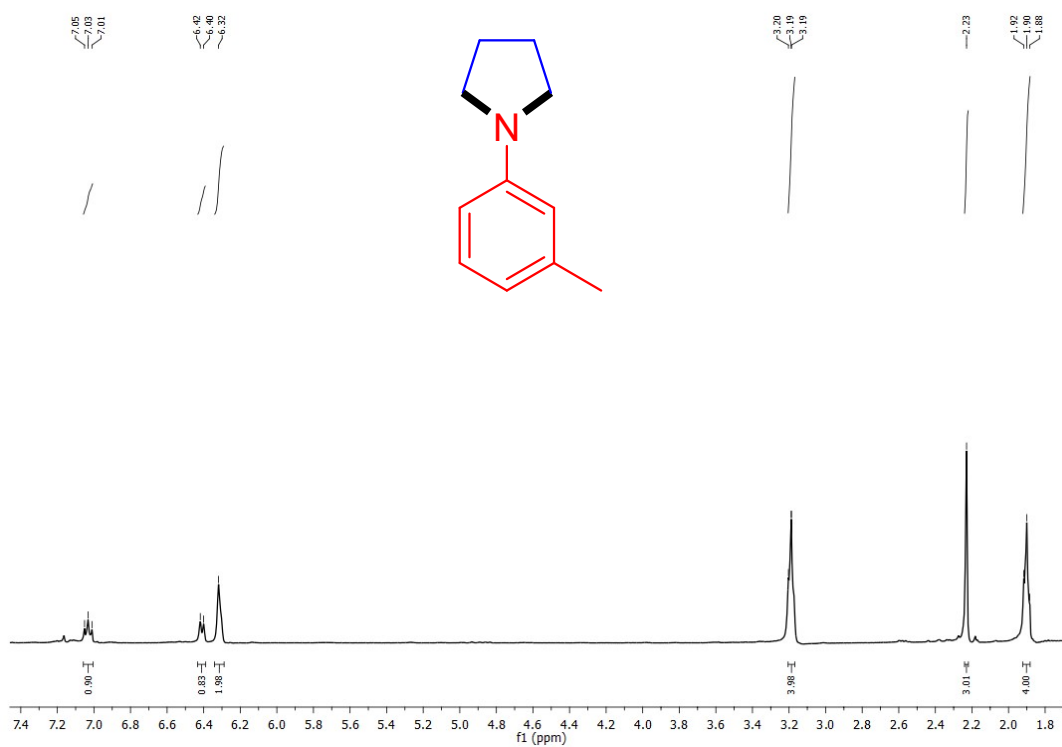

d) 1-(4-methoxyphenyl)pyrrolidine (3d)

$^1\text{H NMR}$  (400 MHz,  $\text{CDCl}_3$ )  $\delta$  6.78 (d,  $J = 8.9$  Hz, 2H), 6.48 (d,  $J = 8.5$  Hz, 2H), 3.68 (s, 3H), 3.17 (d,  $J = 6.0$  Hz, 4H), 1.93 (d,  $J = 6.3$  Hz, 4H).

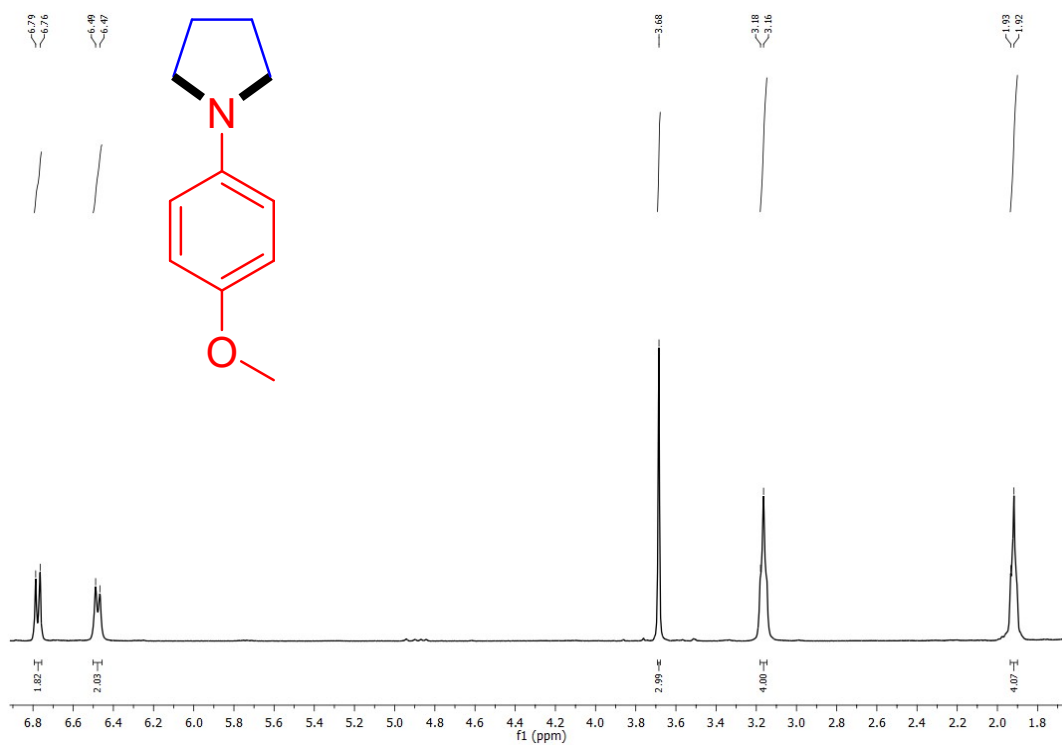

e) 1-(2-methoxyphenyl)pyrrolidine (3e)

$^1\text{H NMR}$  (400 MHz,  $\text{CDCl}_3$ )  $\delta$  6.88 (d,  $J = 1.1$  Hz, 1H), 6.84 (t,  $J = 6.9$  Hz, 2H), 6.79 (d,  $J = 7.5$  Hz, 2H), 3.83 (s, 3H), 3.28 (t,  $J = 6.0$  Hz, 4H), 1.93 (t,  $J = 6.1$  Hz, 4H).

$^{13}\text{C NMR}$  (101 MHz,  $\text{CDCl}_3$ )  $\delta$  150.47, 150.45, 121.10, 119.61, 115.49, 111.77, 55.56, 50.46, 24.68.

$^1\text{H NMR}$  spectrum

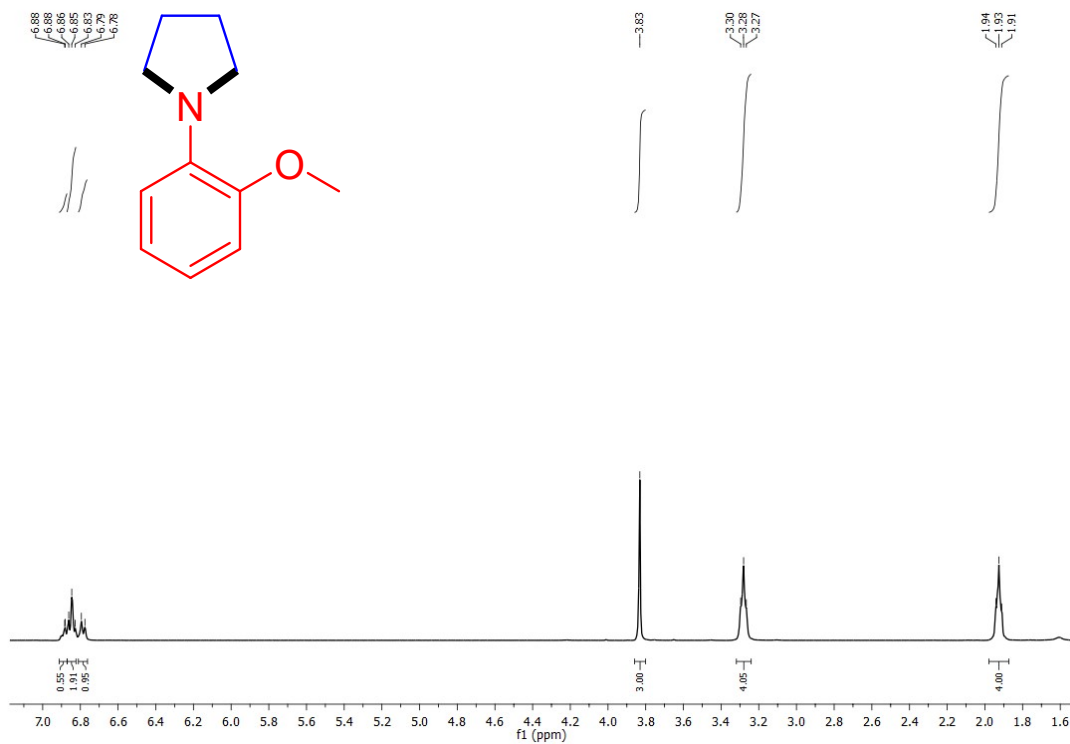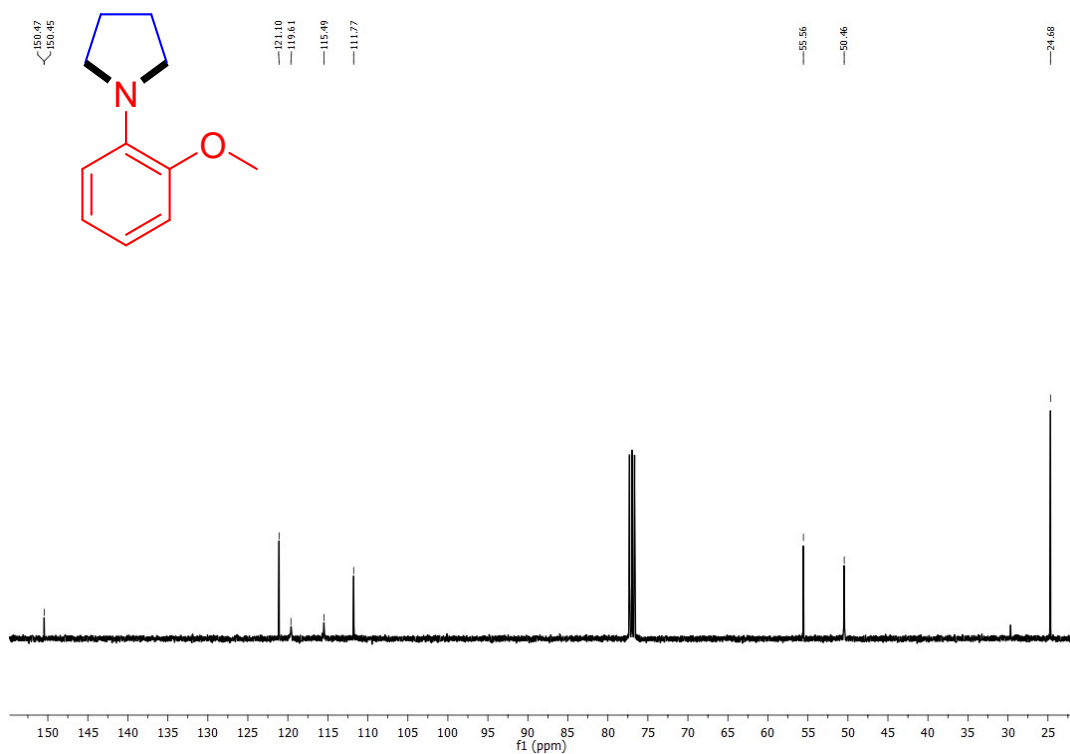

f) 1-(3-nitrophenyl)pyrrolidine (3f)

$^1\text{H NMR}$  (400 MHz,  $\text{CDCl}_3$ )  $\delta$  7.43 (d,  $J = 8.0$  Hz, 1H), 7.29 (s, 1H), 7.28 – 7.23 (m, 1H), 6.77 (dd,  $J = 8.1, 1.6$  Hz, 1H), 3.31 (t,  $J = 6.4$  Hz, 4H), 2.03 (t,  $J = 6.5$  Hz, 4H).

$^{13}\text{C NMR}$  (101 MHz,  $\text{CDCl}_3$ )  $\delta$  149.30, 148.18, 129.45, 117.16, 109.74, 105.57, 47.77, 25.42.

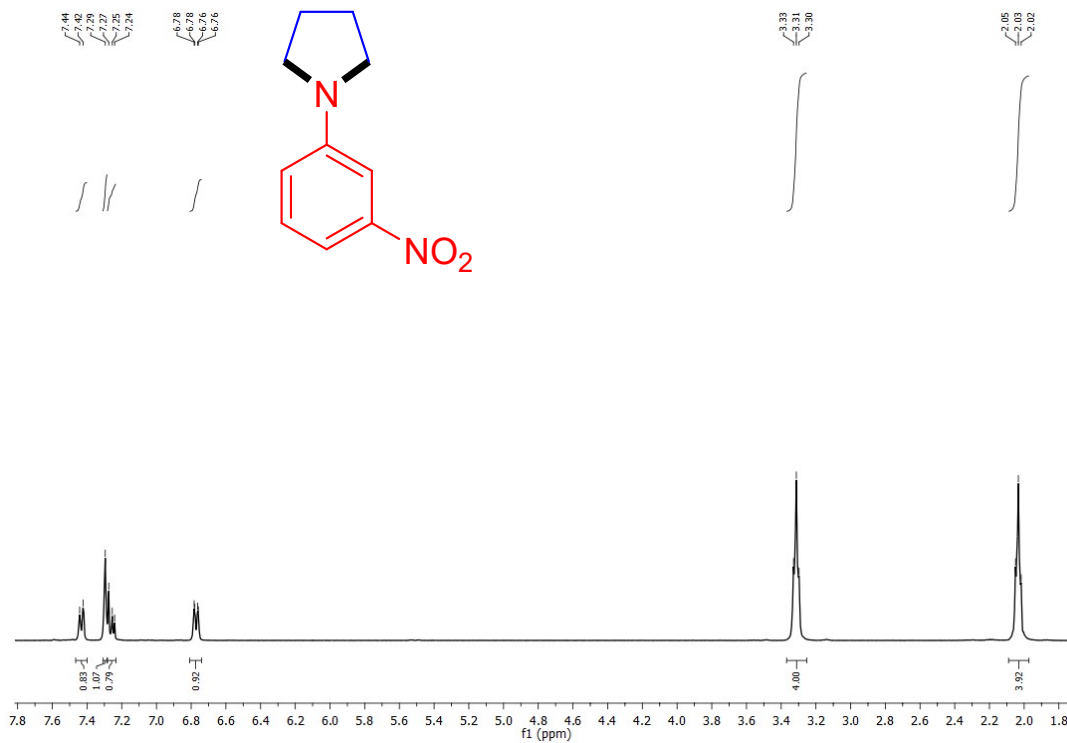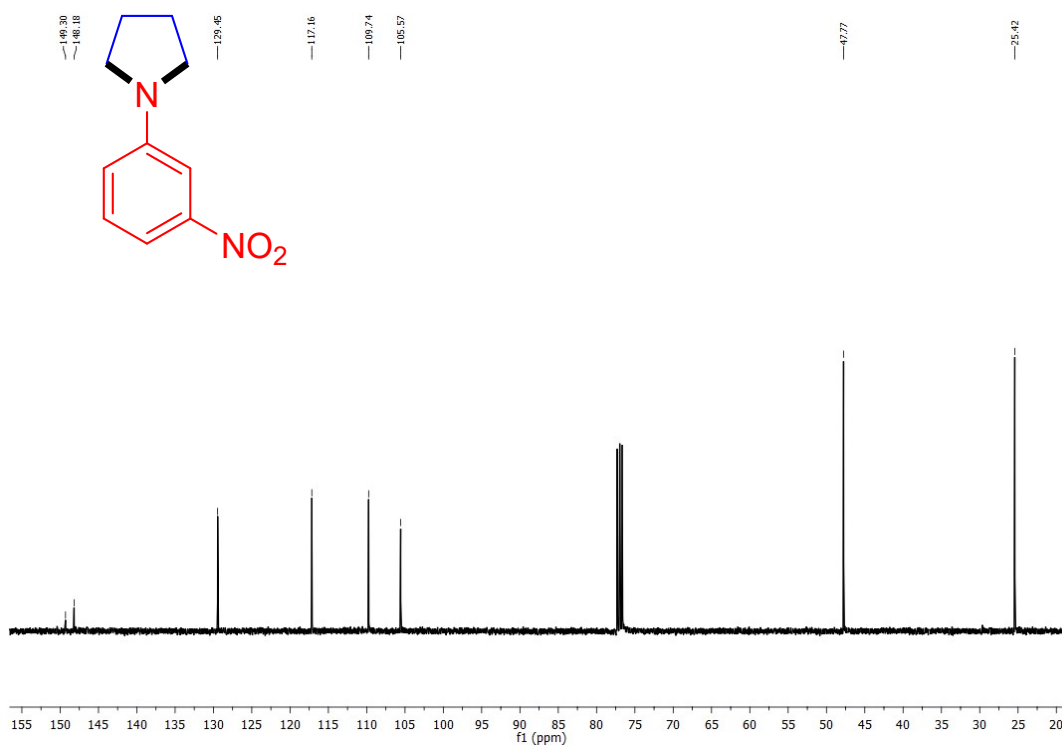



g) 1-(3-chlorophenyl)pyrrolidine (3g)

$^1\text{H NMR}$  (400 MHz,  $\text{CDCl}_3$ )  $\delta$  7.10 (t,  $J = 8.1$  Hz, 1H), 6.60 (dd,  $J = 7.8, 1.1$  Hz, 1H), 6.51 (t,  $J = 2.0$  Hz, 1H), 6.41 (dd,  $J = 8.3, 1.9$  Hz, 1H), 3.25 (t,  $J = 6.6$  Hz, 4H), 2.06-1.94 (m, 4H).

$^{13}\text{C NMR}$  (101 MHz,  $\text{CDCl}_3$ )  $\delta$  148.83, 134.90, 129.94, 115.08, 114.89, 111.37, 109.81, 47.56, 25.40.

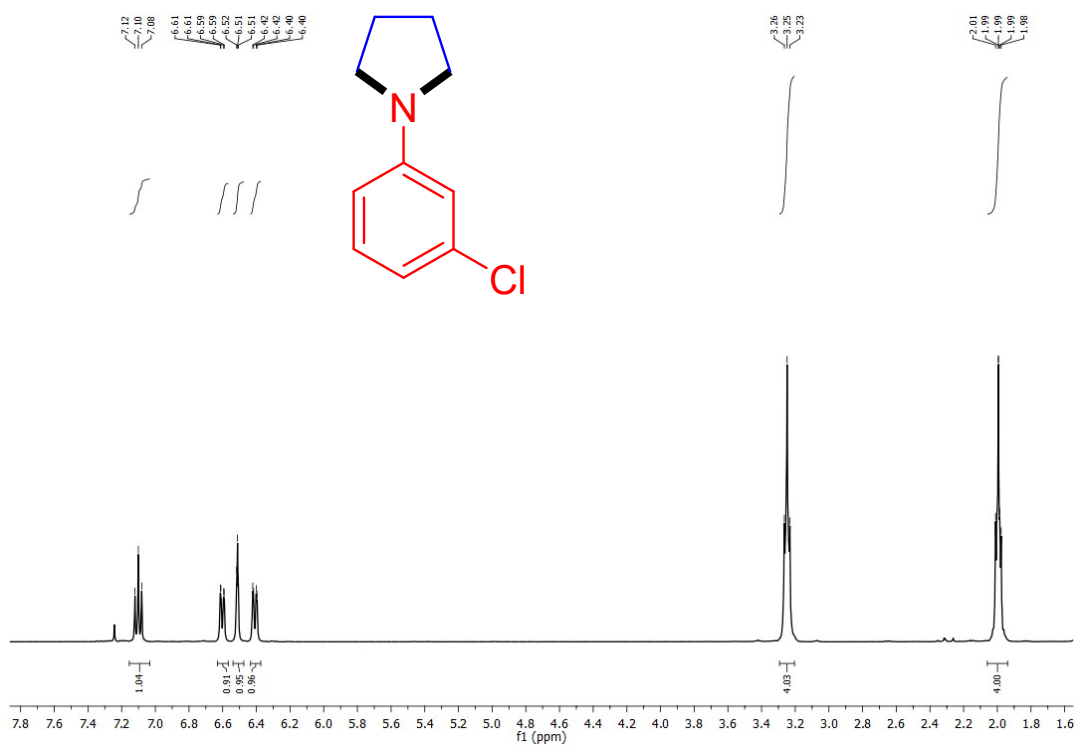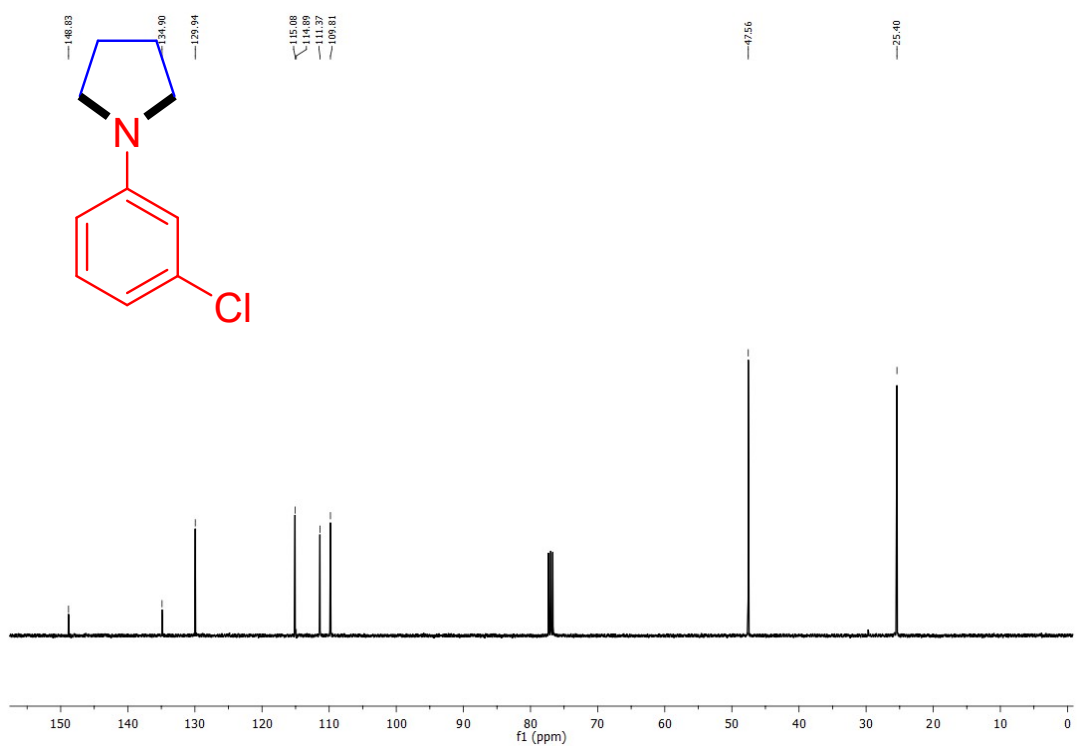

h) 1-(2-chlorophenyl)pyrrolidine (3h)

$^1\text{H}$  NMR (400 MHz,  $\text{CDCl}_3$ )  $\delta$  7.28 (d,  $J = 7.9$  Hz, 1H), 7.13 (t,  $J = 7.0$  Hz, 1H), 6.88 (d,  $J = 8.2$  Hz, 1H), 6.77 (t,  $J = 7.6$  Hz, 1H), 3.36 (t,  $J = 6.6$  Hz, 4H), 1.98 – 1.89 (m, 4H).

$^{13}\text{C}$  NMR (101 MHz,  $\text{CDCl}_3$ )  $\delta$  147.09, 131.18, 127.10, 123.42, 120.10, 117.05, 50.85, 25.12.

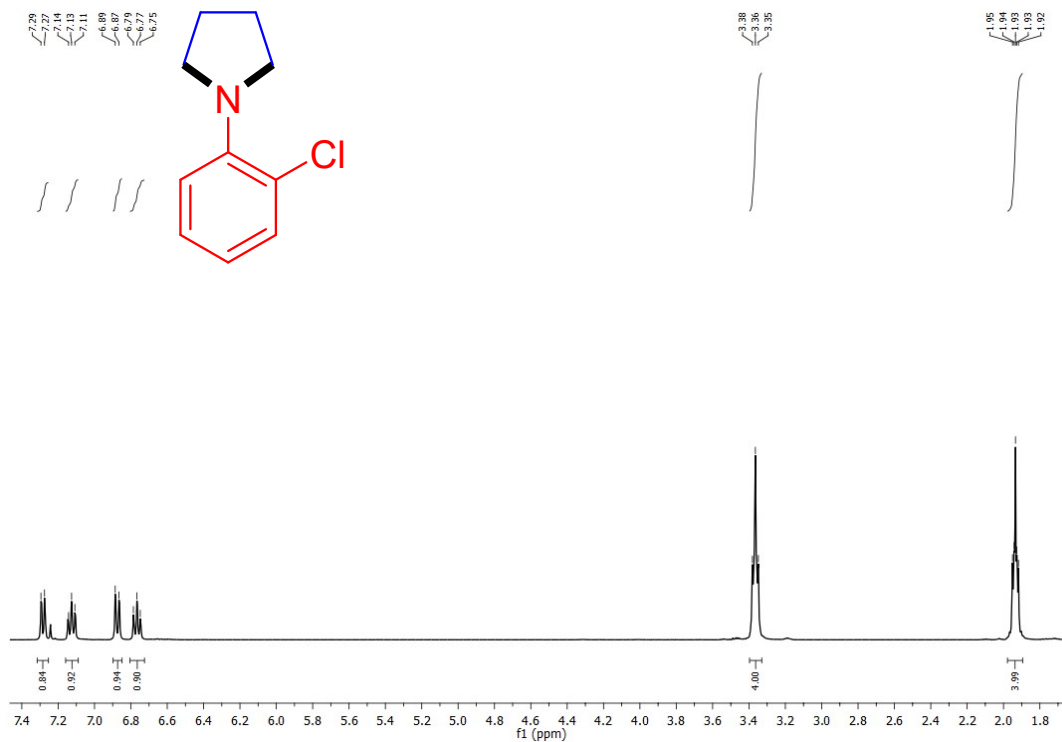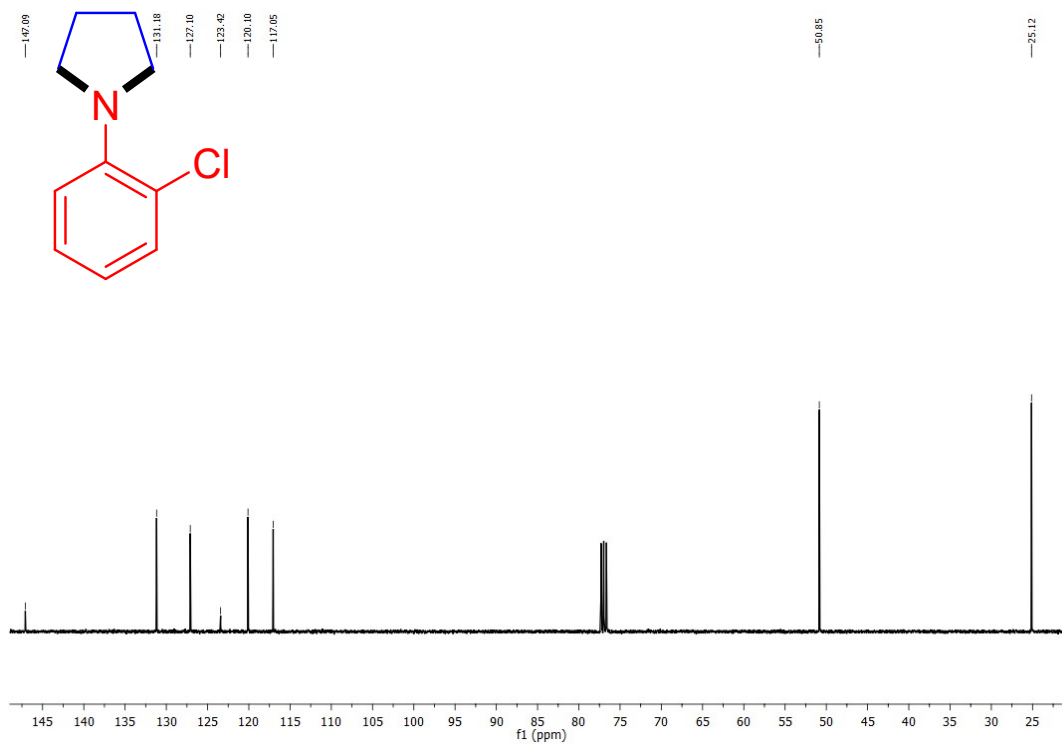

i) 1-(4-chlorophenyl)pyrrolidine (3i)

$^1\text{H NMR}$  (400 MHz,  $\text{CDCl}_3$ )  $\delta$  7.14 (d,  $J = 8.8$  Hz, 2H), 6.45 (d,  $J = 8.8$  Hz, 2H), 3.23 (t,  $J = 6.4$  Hz, 4H), 2.01-1.96 (m, 4H).

$^{13}\text{C NMR}$  (101 MHz,  $\text{CDCl}_3$ )  $\delta$  146.49, 128.79, 120.05, 112.58, 47.69, 25.44.

HRMS (ESI)  $m/z$ : (M-H) $^+$  calcd for  $\text{C}_{10}\text{H}_{13}\text{ClN}$ , 180.0580 $^1$ ; found, 180.0573

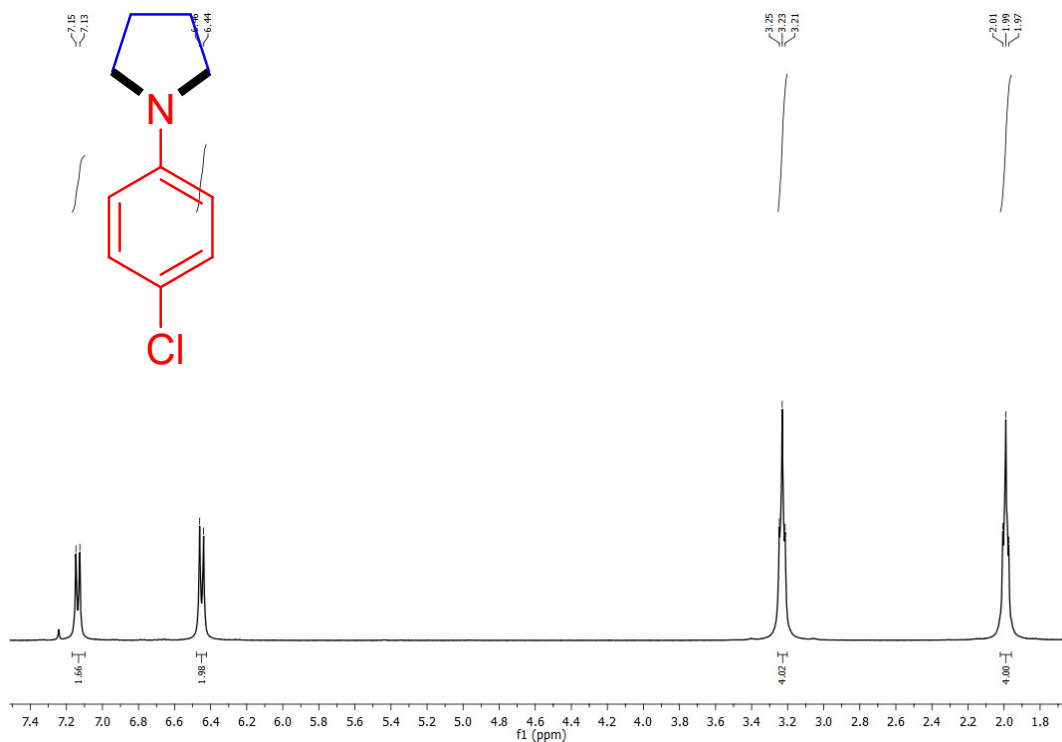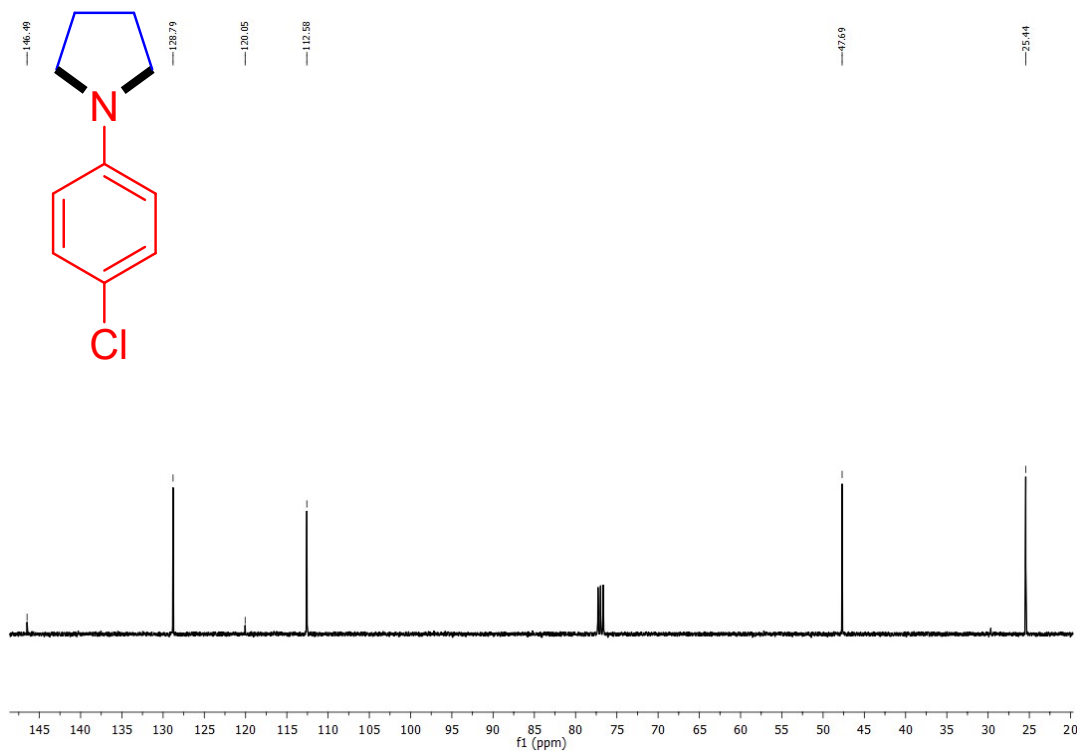

j) 1-(2,3-dichlorophenyl)pyrrolidine (3j)

$^1\text{H}$  NMR (400 MHz,  $\text{cdCl}_3$ )  $\delta$  7.03 (t,  $J = 8.1$  Hz, 1H), 6.95 (dd,  $J = 7.9, 1.5$  Hz, 1H), 6.78 (dd,  $J = 8.2, 1.4$  Hz, 1H), 3.35 (t,  $J = 6.6$  Hz, 4H), 1.97 – 1.89 (m, 4H).

$^{13}\text{C}$  NMR (101 MHz,  $\text{CDCl}_3$ )  $\delta$  149.08, 134.36, 126.97, 121.83, 120.96, 115.13, 51.15, 25.24.

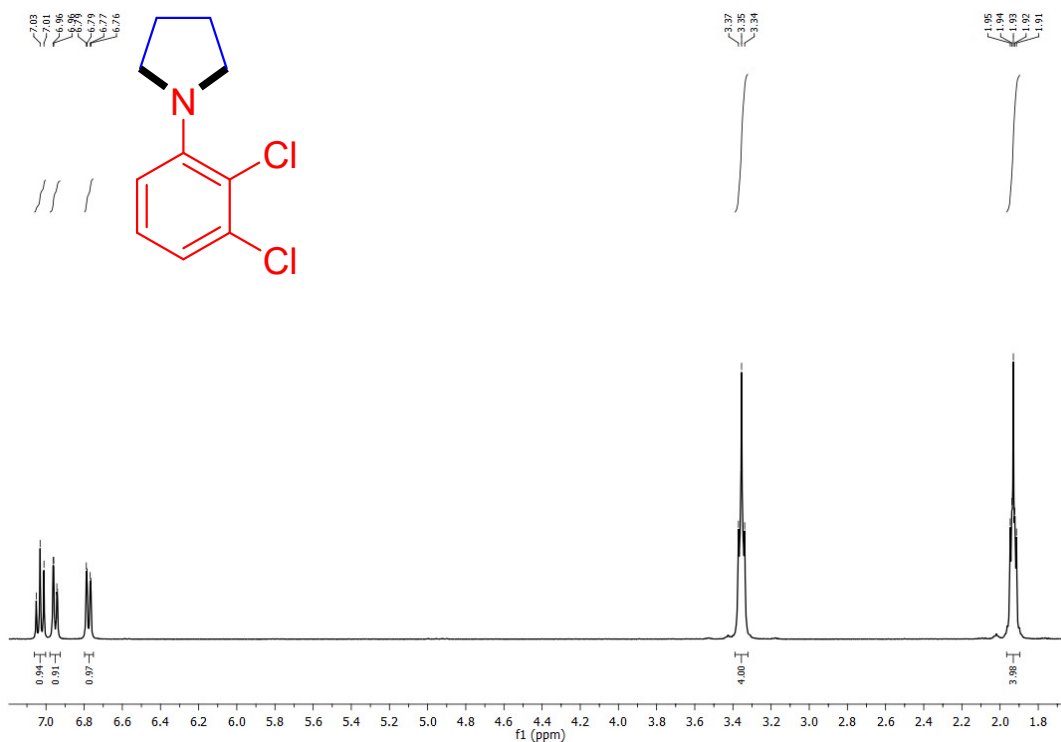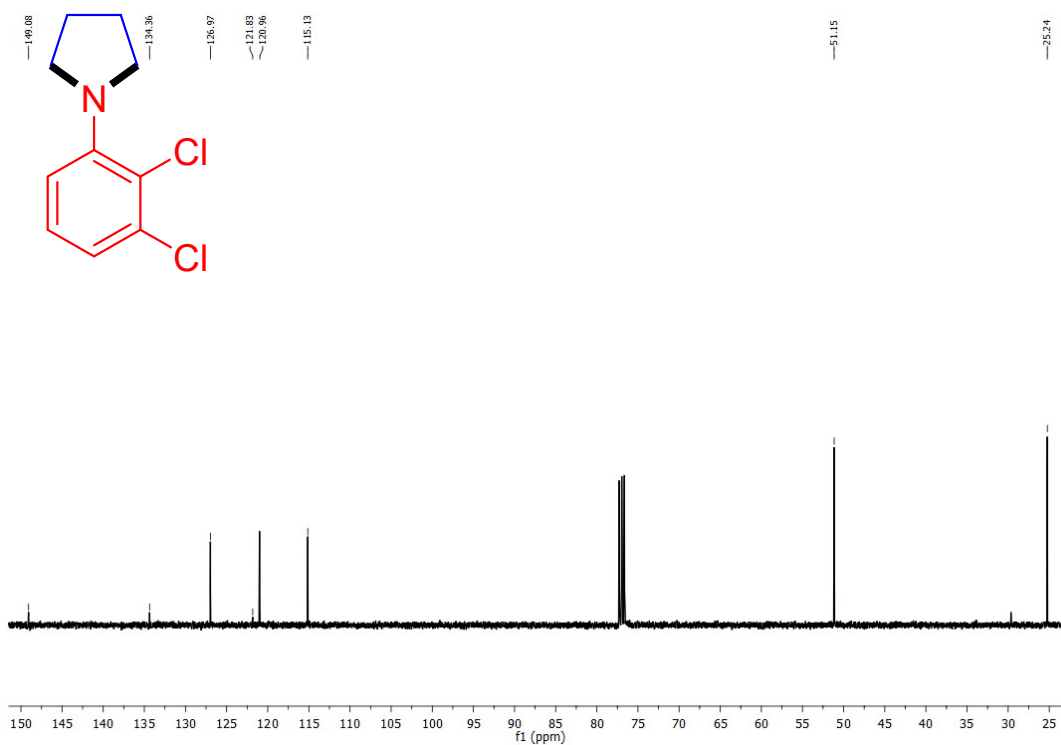

k) 1-(3,5-dichlorophenyl)pyrrolidine (3k)

$^1\text{H NMR}$  (400 MHz,  $\text{CDCl}_3$ )  $\delta$  6.53 (s, 1H), 6.31 (s, 2H), 3.16 (t,  $J = 6.0$  Hz, 4H), 1.93 (t,  $J = 6.1$  Hz, 4H).

$^{13}\text{C NMR}$  (101 MHz,  $\text{CDCl}_3$ )  $\delta$  131.60, 126.22, 120.27, 115.78, 51.02, 24.89

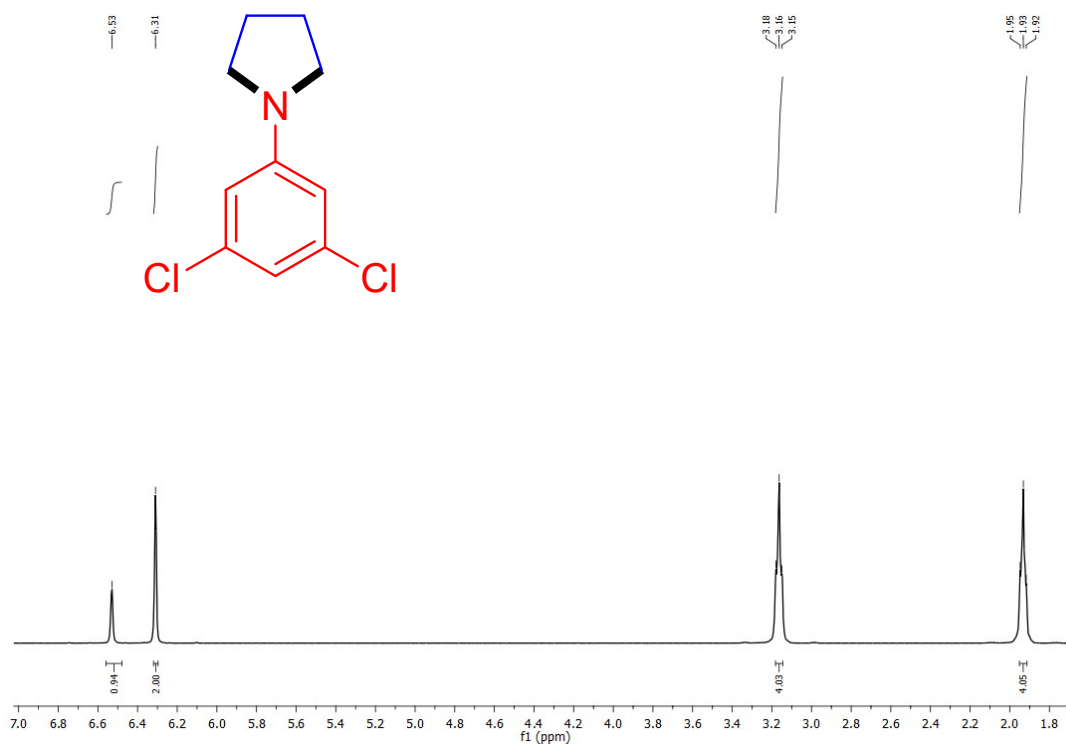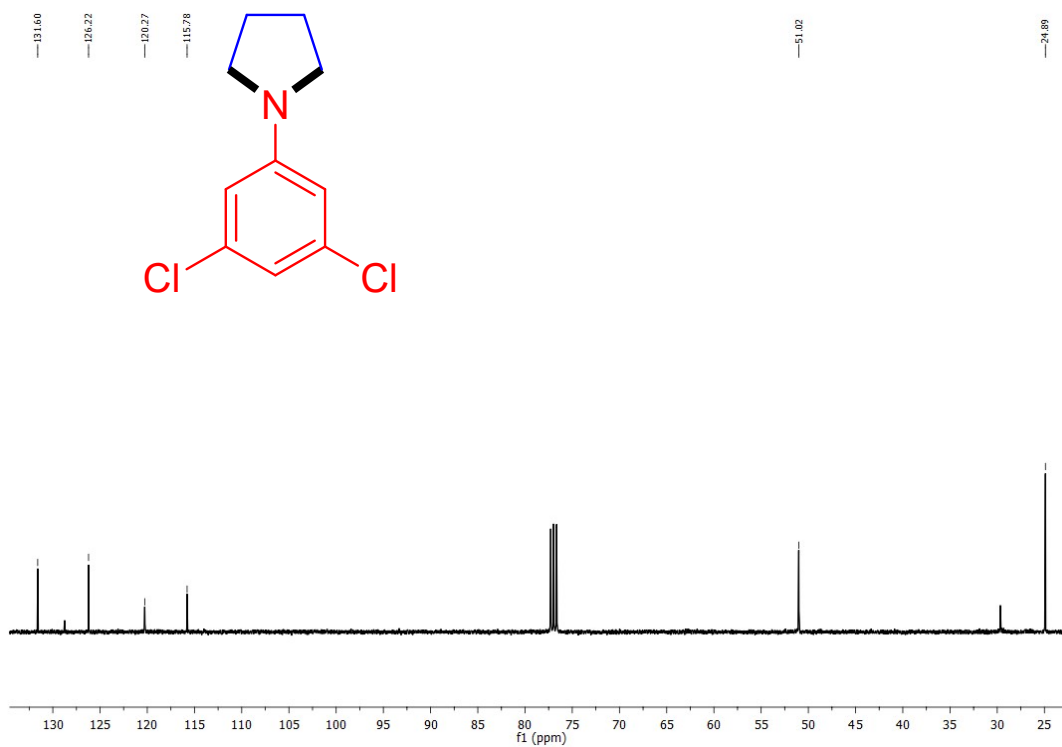

1) 1-(4-bromophenyl)pyrrolidine (31)

$^1\text{H NMR}$  (400 MHz,  $\text{CDCl}_3$ )  $\delta$  7.27 (d,  $J = 2.1$  Hz, 1H), 7.25 (d,  $J = 2.1$  Hz, 1H), 6.40 (d,  $J = 8.9$  Hz, 2H), 3.22 (t,  $J = 6.6$  Hz, 4H), 2.02 – 1.96 (m, 4H).

$^{13}\text{C NMR}$  (101 MHz,  $\text{CDCl}_3$ )  $\delta$  146.82, 131.64, 113.15, 107.08, 47.64, 25.43.

HRMS (ESI)  $m/z$ : (M) $^+$  calcd for  $\text{C}_{10}\text{H}_{13}\text{BrN}$ , 226.0011; found, 226.0046

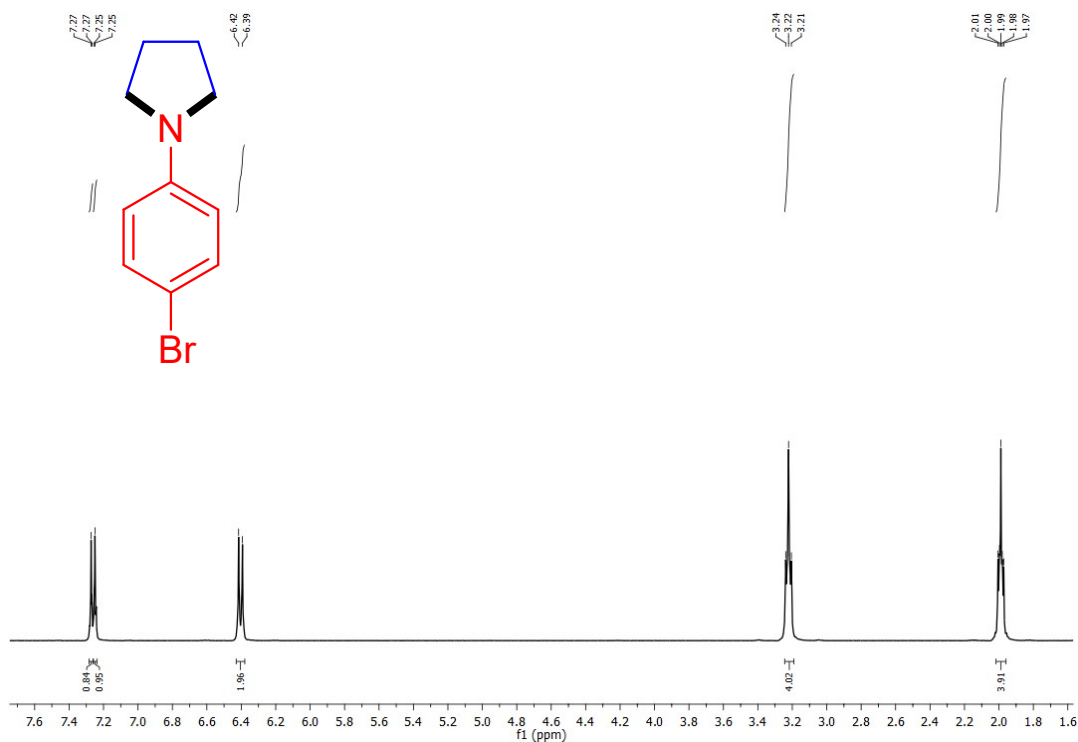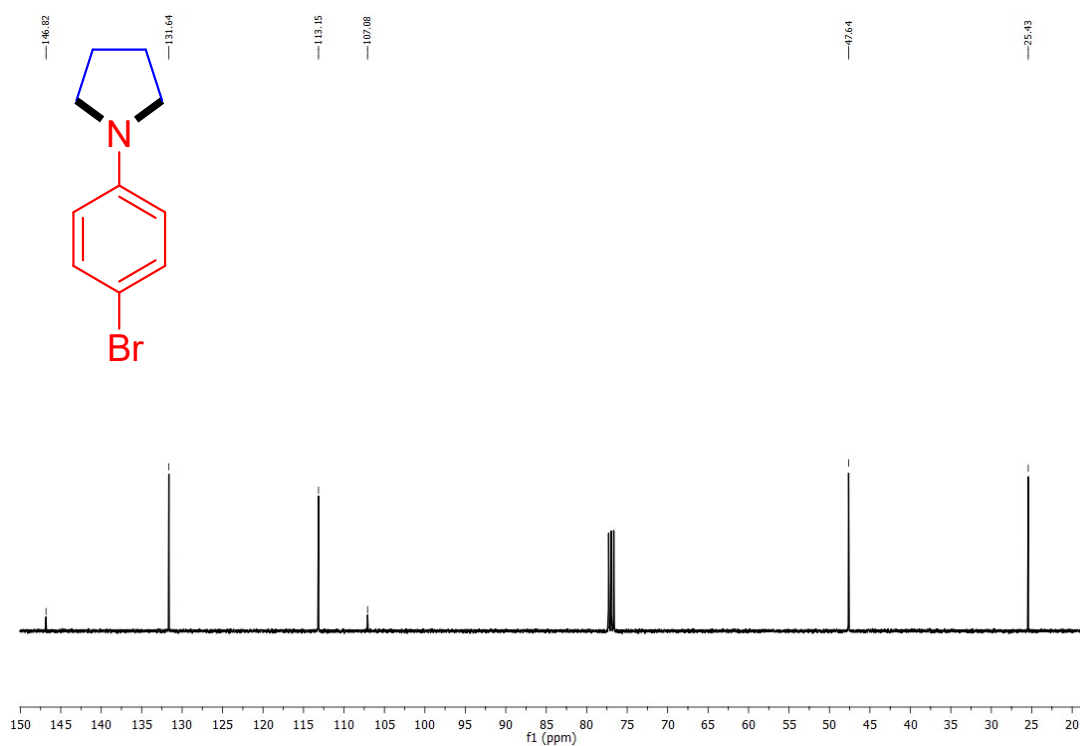

m) 1-(3-chloro-4-fluorophenyl)pyrrolidine (3m)

$^1\text{H NMR}$  (400 MHz,  $\text{CDCl}_3$ )  $\delta$  6.96 (t,  $J = 9.0$  Hz, 1H), 6.49 (dd,  $J = 6.0, 2.9$  Hz, 1H), 6.33 (dt,  $J = 8.9, 3.3$  Hz, 1H), 3.20 (t,  $J = 6.5$  Hz, 4H), 2.02 – 1.97 (m, 4H).

$^{13}\text{C NMR}$  (101 MHz,  $\text{cdCl}_3$ )  $\delta$  150.93, 148.63 ( $J = 235.8$  Hz F coupling), 145.09, 120.92, 120.75, 116.63, 116.42, 112.33, 110.36, 110.30, 47.93, 25.44.

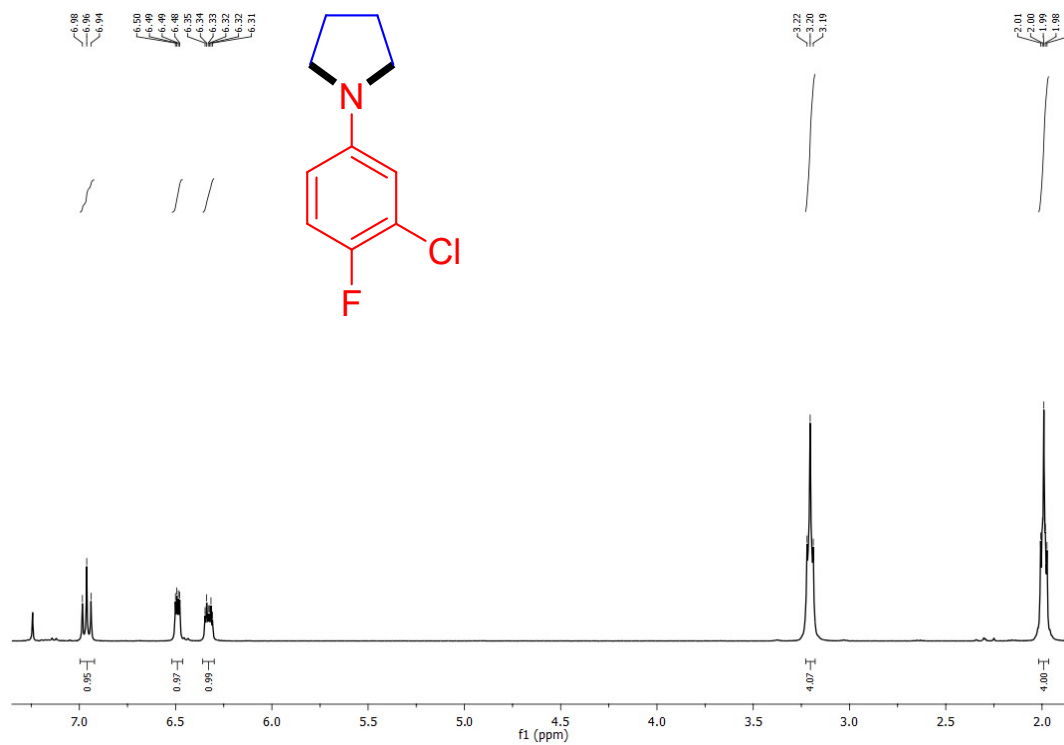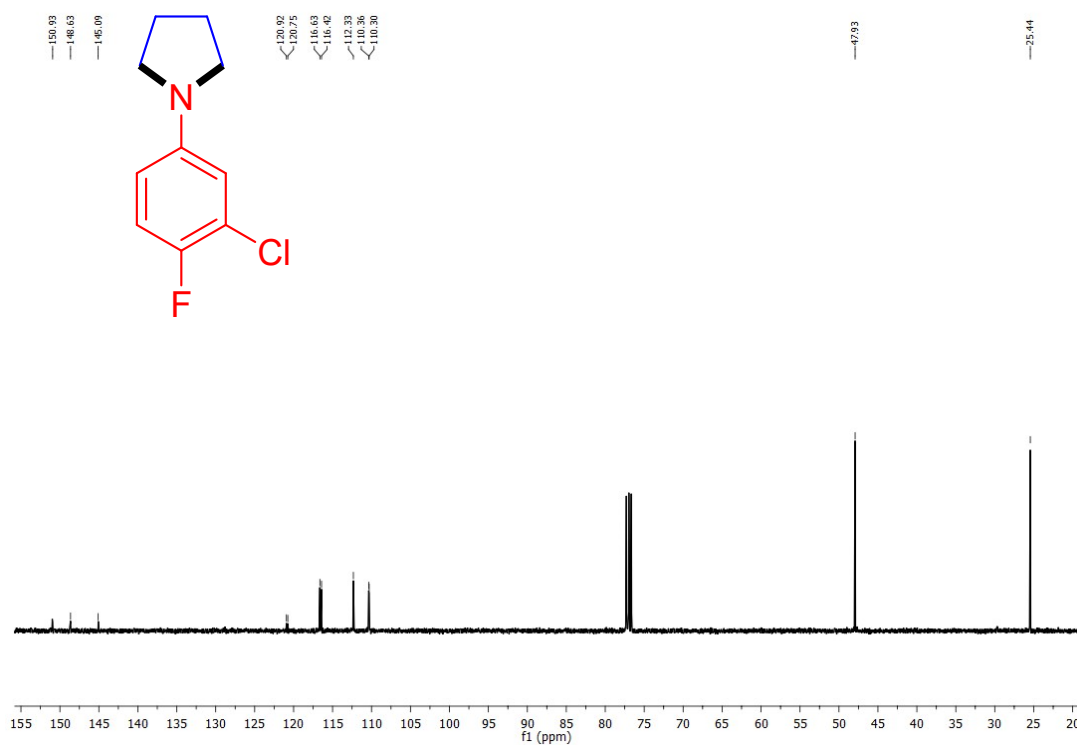

n) 3-methyl-1-phenylpyrrolidine (3n)

$^1\text{H NMR}$  (400 MHz,  $\text{CDCl}_3$ )  $\delta$  7.23 (t,  $J = 7.6$  Hz, 2H), 6.66 (t,  $J = 7.1$  Hz, 1H), 6.60 (d,  $J = 8.3$  Hz, 2H), 3.96 – 3.77 (m, 1H), 3.44 (t,  $J = 7.5$  Hz, 1H), 3.17 (dd,  $J = 16.3$ , 8.0 Hz, 1H), 2.08 (dt,  $J = 12.8$ , 7.4 Hz, 2H), 1.99 (dd,  $J = 10.6$ , 5.8 Hz, 1H), 1.74 – 1.66 (m, 1H), 1.19 (d,  $J = 6.2$  Hz, 3H).<sup>2</sup>

$^{13}\text{C NMR}$  (101 MHz,  $\text{CDCl}_3$ )  $\delta$  147.22, 129.13, 115.12, 111.76, 53.57, 48.13, 33.12, 23.28, 19.36.

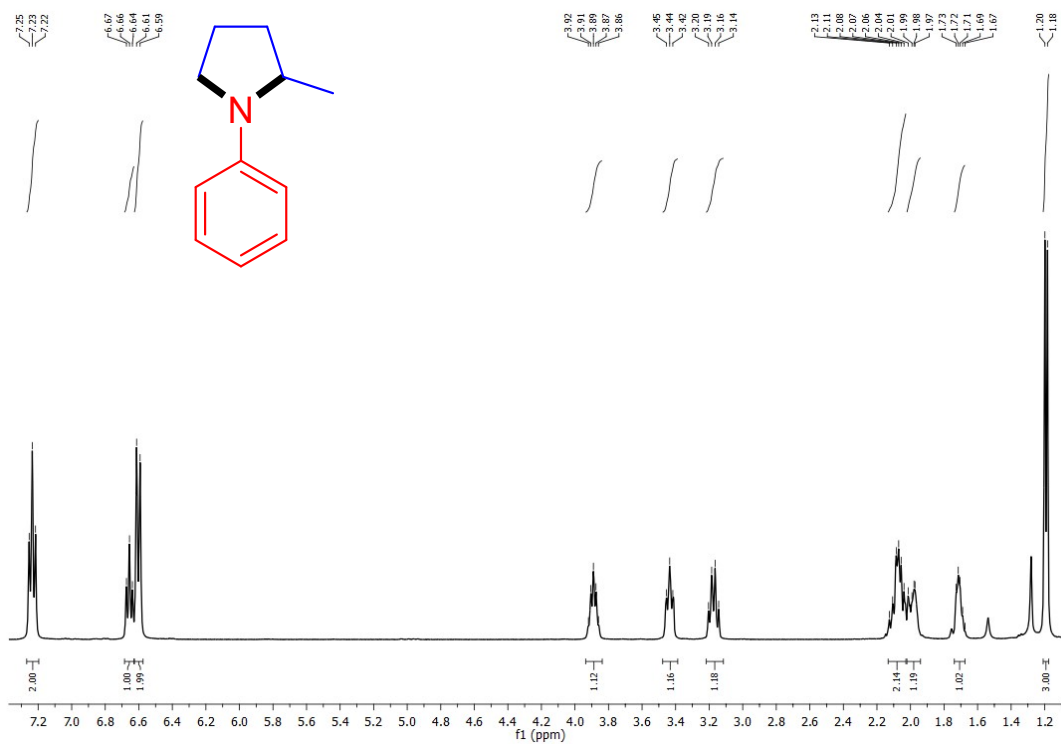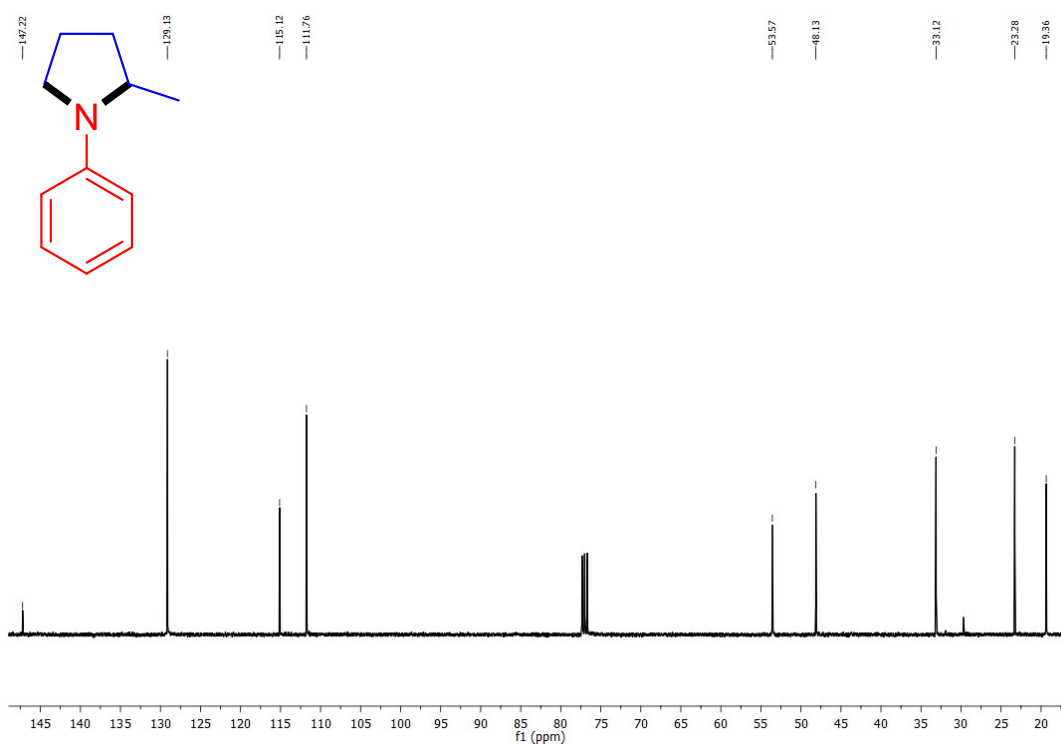



o) 1-phenylpiperidine (3o)

$^1\text{H}$  NMR (400 MHz,  $\text{CDCl}_3$ )  $\delta$  7.23 (t,  $J = 8.0$  Hz, 2H), 7.00 – 6.86 (m, 2H), 6.81 (t,  $J = 7.3$  Hz, 1H), 3.19 – 3.09 (m, 4H), 1.70 (dt,  $J = 11.3, 5.7$  Hz, 4H), 1.57 (dd,  $J = 11.4, 5.9$  Hz, 2H).

$^{13}\text{C}$  NMR (101 MHz,  $\text{CDCl}_3$ )  $\delta$  152.23, 128.95, 119.13, 116.49, 50.66, 25.84, 24.30.

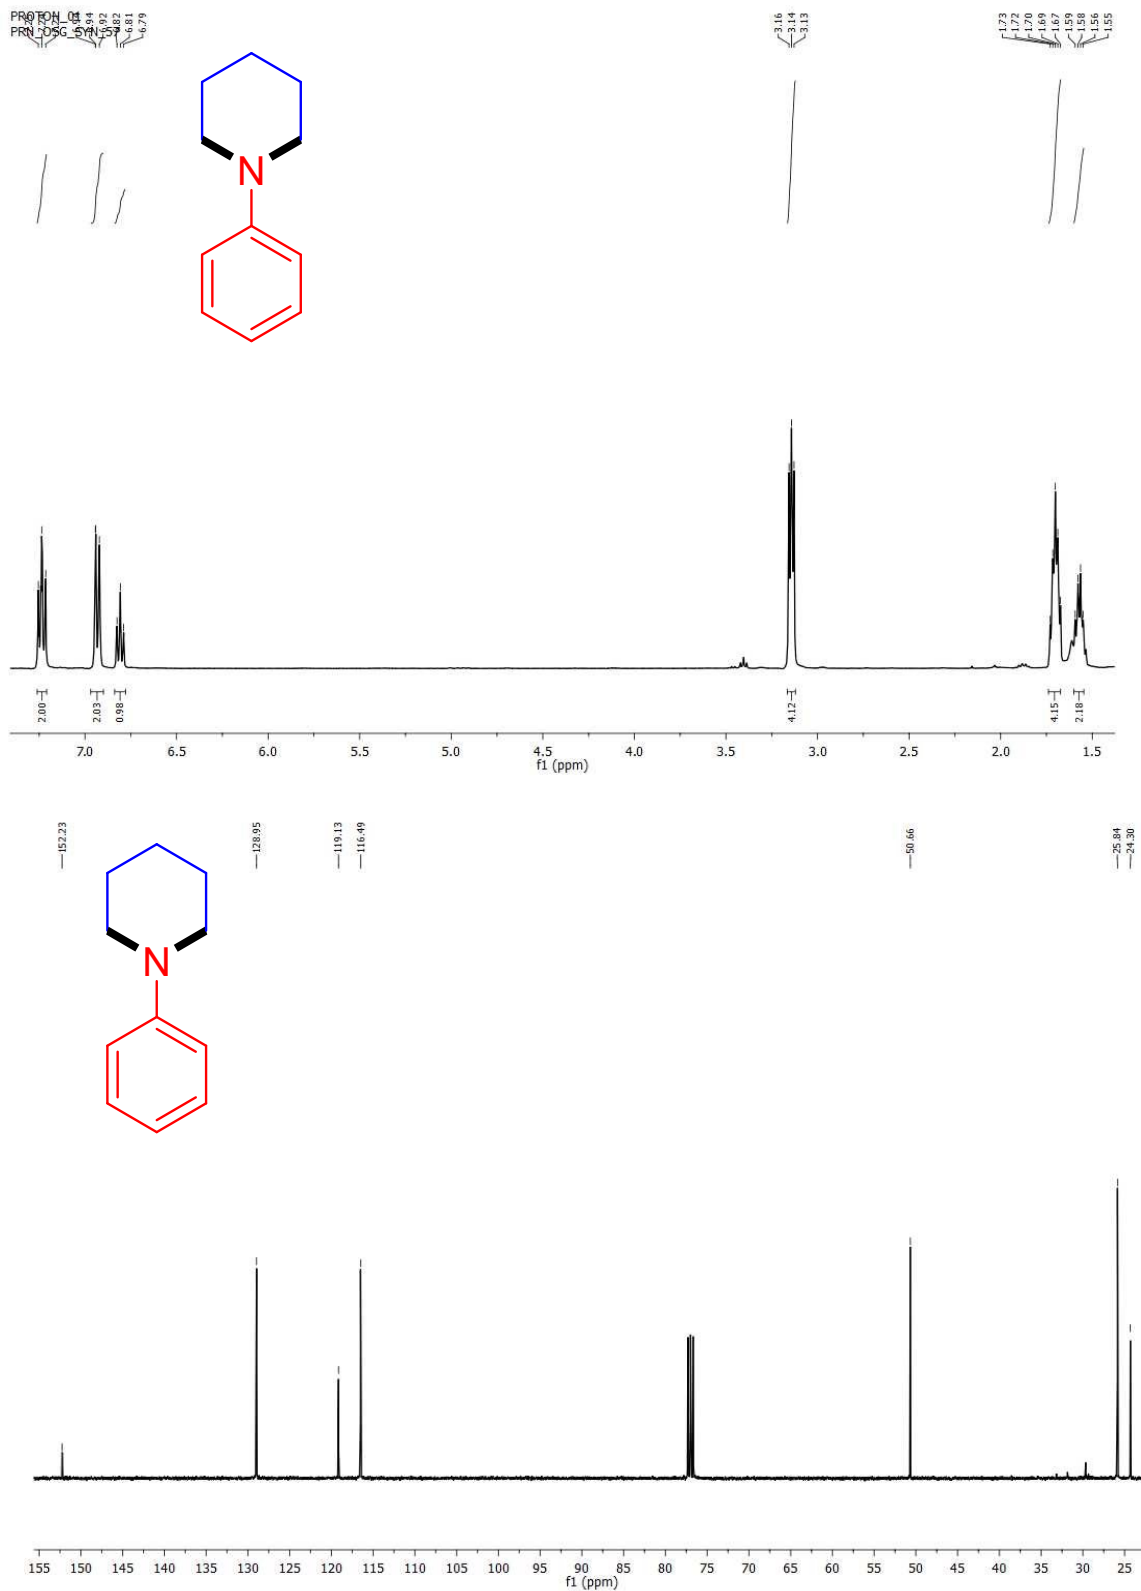

**p)** 2-phenylisoindoline (3p)

$^1\text{H}$  NMR (400 MHz,  $\text{CDCl}_3$ )  $\delta$  7.33 (dd,  $J = 7.9, 6.6$  Hz, 6H), 6.85 – 6.62 (m, 3H), 4.66 (s, 4H).

$^{13}\text{C}$  NMR (101 MHz,  $\text{CDCl}_3$ )  $\delta$  147.15, 137.93, 129.36, 127.14, 122.58, 116.17, 111.57, 53.7

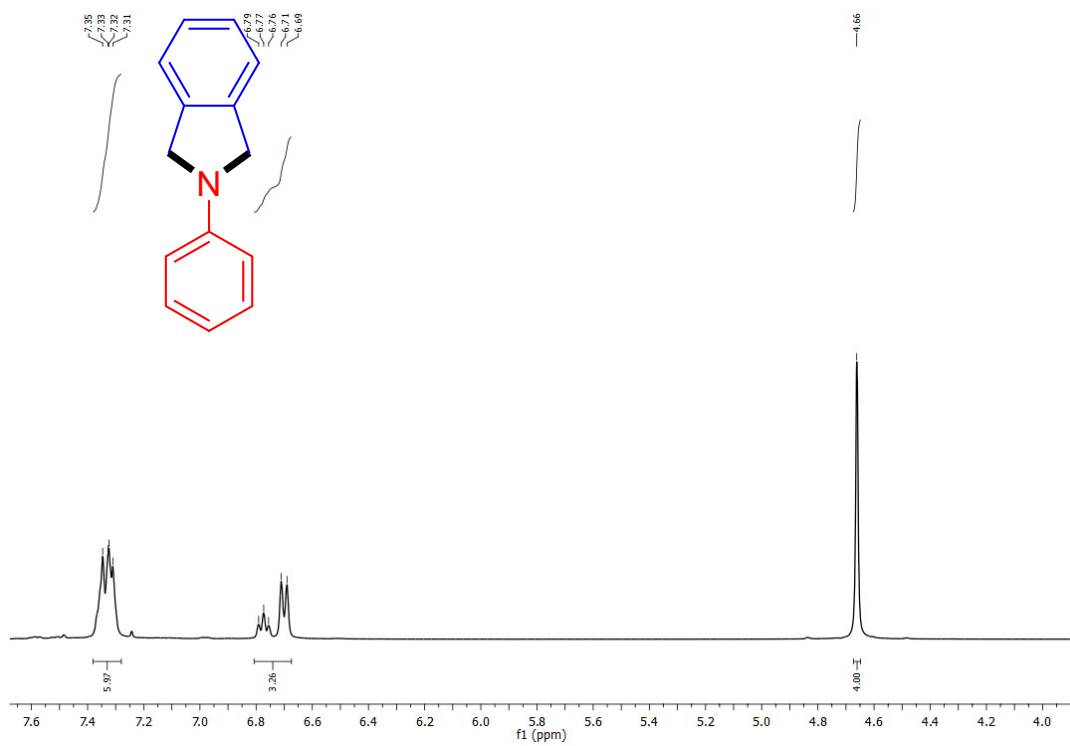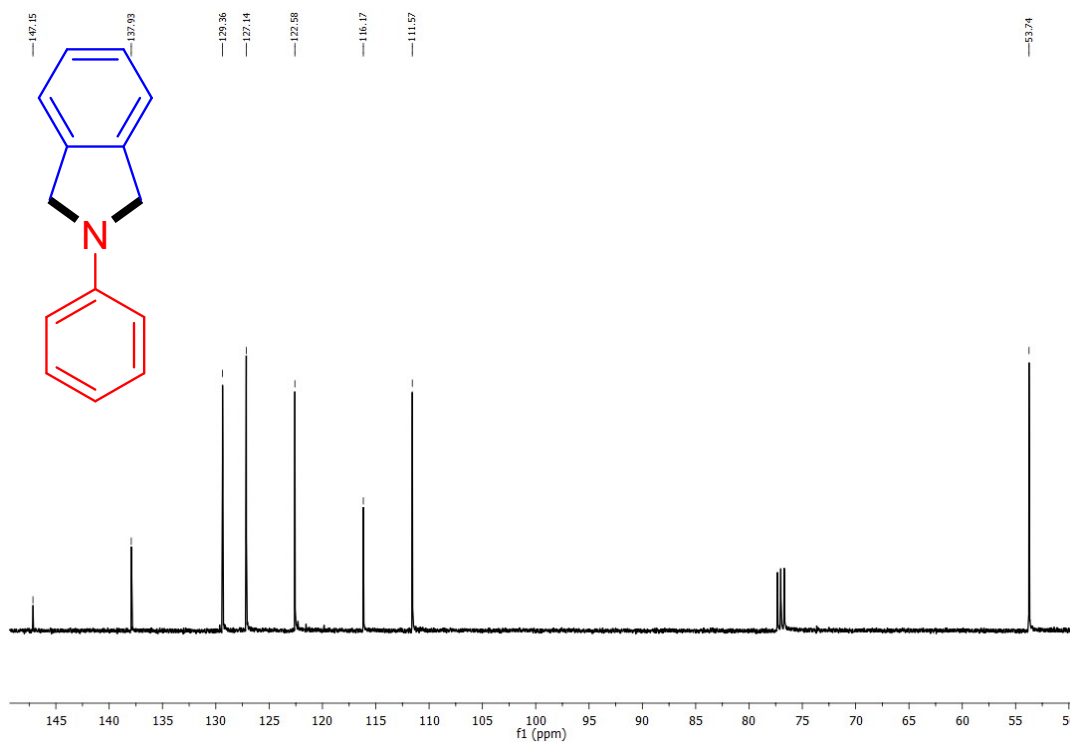

## References:

- (1) Korbadi, B. L.; Lee, S.-H. Synthesis of N-Aryl Substituted, Five- and Six-Membered Azacycles Using Aluminum-Amide Complexes. *Chem. Commun.* **2014**, *50* (64), 8985–8988. <https://doi.org/10.1039/C4CC04111A>.
- (2) Ju, Y.; Varma, R. S. Aqueous N-Heterocyclization of Primary Amines and Hydrazines with Dihalides: Microwave-Assisted Syntheses of N-Azacycloalkanes, Isoindole, Pyrazole, Pyrazolidine, and Phthalazine Derivatives. *J. Org. Chem.* **2006**, *71* (1), 135–141. <https://doi.org/10.1021/jo051878h>.
